# Supplementary material for: A Novel Inherently Flame-Retardant Composite Based on Zinc Alginate/Nano-Cu2O
Source: PubMed Central journal article supplement (PMC6835664; doi:10.3390/polym11101575), 2019-09-27
Supplement: polymers-11-01575-s001.pdf [file polymers-11-01575-s001.pdf]

*Supplementary Information*

# A Novel Inherently Flame-Retardant Composite Based on Zinc Alginate/Nano-Cu<sub>2</sub>O

Peng Xu <sup>1</sup>, Peiyuan Shao <sup>1</sup>, Qing Zhang <sup>1</sup>, Wen Cheng <sup>1</sup>, Zichao Li <sup>2,\*</sup> and Qun Li <sup>1,\*</sup>

<sup>1</sup> College of Chemical Science and Engineering, Qingdao University, Qingdao 266071, China

<sup>2</sup> Institute of Advanced Cross-Field Science, College of Life Sciences, Qingdao University, Qingdao 266071, China

\* Correspondence: qunli@qdu.edu.cn (Q.L.), zichaoqi@qdu.edu.cn (Z.L.); Tel.: +86-532-8595-0705(Q.L.)

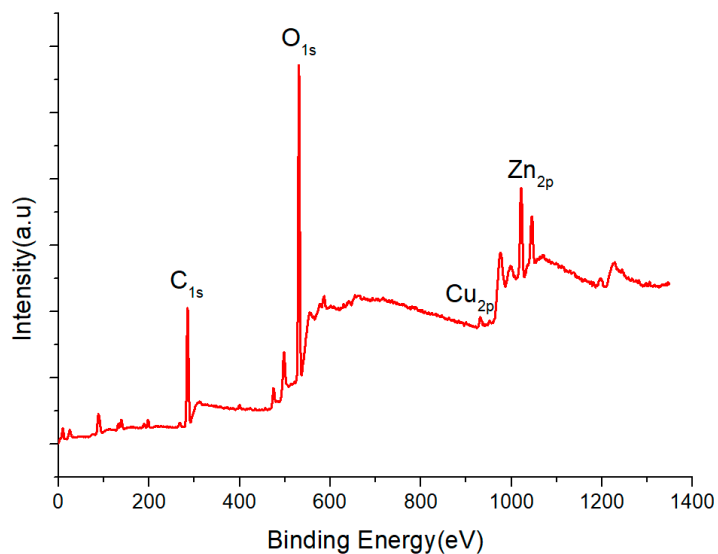

Figure S1. The XPS spectra of survey for ZnAlg/Cu<sub>2</sub>O.

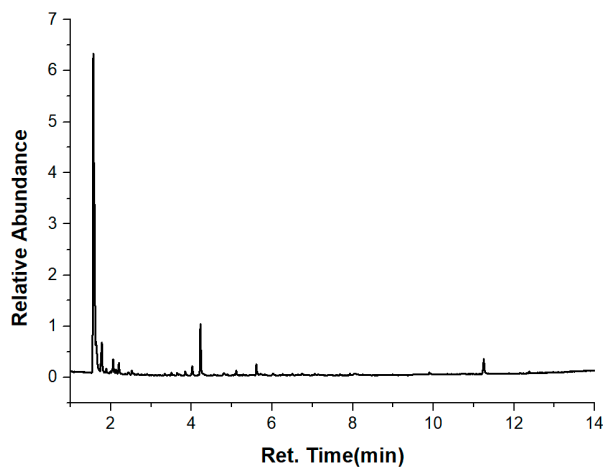

Figure S2. Py-GC-MS spectra of ZnAlg at 750 °C

**Table S1.** Pyrolysis products of ZnAlg at 750 °C

| Molecular structure                                                                 | Name of compound               | T=750 °C |       |
|-------------------------------------------------------------------------------------|--------------------------------|----------|-------|
|                                                                                     |                                | Time     | Area  |
| 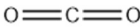   | carbon dioxide                 | 1.57     | 63.56 |
|    | furfural                       | 4.23     | 7.95  |
|    | acetone                        | 1.78     | 4.50  |
|    | i-Propyl 9-tetradecenoate      | 11.25    | 2.70  |
|    | 2,3-butanedione                | 2.06     | 2.13  |
|    | 2-furancarboxaldehyde,5-methyl | 5.61     | 1.41  |
|   | furan,2-methyl-                | 2.13     | 0.35  |
|  | benzene                        | 2.52     | 0.79  |
|  | acetic acid                    | 2.20     | 1.35  |
|  | 4-cyclopentene-1,3-dione       | 4.83     | 0.71  |
|  | 1,3-cyclopentadiene            | 1.89     | 0.37  |
|  | 2-furancarboxaldehyde,5-methyl | 5.11     | 0.99  |
|  | styrene                        | 4.89     | 0.71  |
|  | phenol                         | 6.02     | 0.48  |

|                                                                                     |                                                                    |       |      |
|-------------------------------------------------------------------------------------|--------------------------------------------------------------------|-------|------|
| 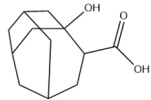   | 3-Hydroxy-tricyclo[4.3.1.1(3,8)]undecane-4carboxylic acid          | 3.65  | 0.58 |
|    | Phenol,3,5-bis(1,1-dimethylethyl)-                                 | 9.90  | 0.43 |
|    | 2-butenal, (E)-                                                    | 2.44  | 0.41 |
|    | toluene                                                            | 3.50  | 0.49 |
|   | ethylbenzene                                                       | 4.58  | 0.28 |
|  | Cyclohexene, 1,5,5-trimethyl-6-acetylmethyl                        | 7.06  | 0.36 |
|  | 4-Octyne                                                           | 11.25 | 2.70 |
|  | Dodecanoic acid, 3-hydroxy                                         | 8.04  | 0.55 |
|  | 1-Tetradecene                                                      | 7.60  | 0.10 |
|  | rhamnazin                                                          | 7.15  | 0.28 |
|  | (3E)-4-(4-Hydroxy-2,6,6-trimethyl-1-cyclohexen-1-yl)-3-buten-2-one | 6.50  | 0.61 |
|  | 2,3,4,5,6,7,8-heptahydroxyoctanal                                  | 6.74  | 0.54 |

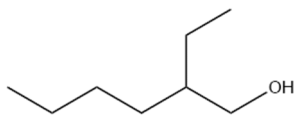

1-Hexanol,2-ethyl-

6.26

0.19
